# Supplementary material for: Autologous cell lines from circulating colon cancer cells captured from sequential liquid biopsies as model to study therapy-driven tumor changes
Source: PubMed Central journal article supplement (PMC6206091; doi:10.1038/s41598-018-34365-z), 2018-10-29

# **Autologous cell lines from circulating colon cancer cells captured from sequential liquid biopsies as model to study therapy-driven tumor changes**

Alexandra Soler<sup>1\*</sup>, Laure Cayrefourcq<sup>1\*</sup>, Thibault Mazard<sup>2</sup>, Anna Babayan<sup>3</sup>, Pierre-Jean Lamy<sup>4</sup>, Said Assou<sup>5</sup>, Eric Assenat<sup>6</sup>, Klaus Pantel<sup>3</sup>, Catherine Alix-Panabières<sup>1</sup>.

\*contributed equally to this article

<sup>1</sup>Laboratory of Rare Human Circulating Cells, University Medical Centre of Montpellier, EA2415, Montpellier, France;

<sup>2</sup>Department of Medical Oncology, Cancer Institute of Montpellier, Montpellier, France;

<sup>3</sup>Department of Tumor Biology, University Medical Centre Hamburg-Eppendorf, Hamburg, Germany;

<sup>4</sup>Imagenome, Labosud, Montpellier, France;

<sup>5</sup>IRMB, Montpellier University, INSERM U1183, University Medical Centre of Montpellier, Montpellier, F34000 France;

<sup>6</sup>Department of Medical Oncology, University Medical Centre of Montpellier, Montpellier, France.

**Supplementary Table S1. Oncogene mutations analyzed by Imagenome™ colorectal cancer panel.**

|                      | <b>Exons</b> | <b>Codons</b>       |
|----------------------|--------------|---------------------|
| <b><i>KRAS</i></b>   | 2            | 12, 13              |
|                      | 3            | 61                  |
|                      | 4            | 146                 |
| <b><i>NRAS</i></b>   | 2            | 12, 13              |
|                      | 3            | 61                  |
|                      | 4            | 146                 |
| <b><i>BRAF</i></b>   | 15           | 600                 |
| <b><i>PIK3CA</i></b> | 9            | 539, 542, 545, 546  |
|                      | 20           | 1047, 1048, 1049    |
| <b><i>PTEN</i></b>   | 7            | 159, 233, 267 (del) |
| <b><i>AKT</i></b>    | 4            | 17                  |

**Supplementary Table S2. Sequence of the forward and reverse primers used for qRT-PCR analysis**

| Gene            | Entrez Gene Name                                                                                  | Location            | Type                    | Oligo Name       | Sequence 5' to 3'          |                |
|-----------------|---------------------------------------------------------------------------------------------------|---------------------|-------------------------|------------------|----------------------------|----------------|
| <i>DEFA6</i>    | Defensin alpha 6                                                                                  | Extracellular Space | Other                   | Forward Sequence | ATGACCAGGACTTTGCCGTCTC     | NM_001926      |
|                 |                                                                                                   |                     |                         | Reverse Sequence | CATGACAGTGCAGGTCCCATAG     |                |
| <i>BCL11A</i>   | B-cell CLL/lymphoma 11A                                                                           | Nucleus             | Transcription regulator | Forward Sequence | CTCGTTCTGCACATGGAGCTCT     | NM_022893      |
|                 |                                                                                                   |                     |                         | Reverse Sequence | GCAAGAGAAACCATGCACTGGTG    |                |
| <i>IL33</i>     | Interleukin 33                                                                                    | Extracellular Space | Cytokine                | Forward Sequence | GCCTGTCAACAGCAGTCTACTG     | NM_033439      |
|                 |                                                                                                   |                     |                         | Reverse Sequence | TGTGCTTAGAGAAGCAAGATACTC   |                |
| <i>HS6ST2</i>   | Heparan sulfate 6-O-sulfotransferase 2                                                            | Plasma Membrane     | Enzyme                  | Forward Sequence | CTCTCCGTCATCCACAAGACC      | NM_001077188   |
|                 |                                                                                                   |                     |                         | Reverse Sequence | CAGGGATGCTTCCATGTTGCC      |                |
| <i>GJB6</i>     | Gap junction protein beta 6                                                                       | Plasma Membrane     | Transporter             | Forward Sequence | GAAACCCTCGCAAGTTCAGGC      | NM_006783      |
|                 |                                                                                                   |                     |                         | Reverse Sequence | AGGCTGCTTCAAAGATGATTCGG    |                |
| <i>SMARCA1</i>  | SWI/SNF related, matrix associated, actin dependent regulator of chromatin, subfamily a, member 1 | Nucleus             | Transcription regulator | Forward Sequence | AACCTGGCAAGTGTGATGTGG      | NM_003069      |
|                 |                                                                                                   |                     |                         | Reverse Sequence | CAGTGTGTGACATGAGACGG       |                |
| <i>ADAMTS6</i>  | ADAM metalloproteinase with thrombospondin type 1 motif 6                                         | Extracellular Space | Peptidase               | Forward Sequence | GTGATCCTGCAGTAAGCCACC      | NM_197941      |
|                 |                                                                                                   |                     |                         | Reverse Sequence | CCACCATCACAAGTCTTGCTGC     |                |
| <i>BMP7</i>     | Bone morphogenetic protein 7                                                                      | Extracellular Space | Growth factor           | Forward Sequence | GAGTGTGCCTTCCCTCTGAAC      | NM_001719      |
|                 |                                                                                                   |                     |                         | Reverse Sequence | AGGACCGAGATGGCATTGAGCT     |                |
| <i>ABCB1</i>    | ATP binding cassette subfamily B member 1                                                         | Plasma Membrane     | Transporter             | Forward Sequence | GCTGTCAAGGAAGCCAATGCCT     | NM_000927      |
|                 |                                                                                                   |                     |                         | Reverse Sequence | TGCAATGGCGATCCTCTGCTTC     |                |
| <i>CCND2</i>    | Cyclin D2                                                                                         | Nucleus             | Other                   | Forward Sequence | GAGAAGCTGTCTCTGATCCGCA     | NM_001759      |
|                 |                                                                                                   |                     |                         | Reverse Sequence | CTTCCAGTTGCGATCATCGACG     |                |
| <i>TNFRSF1B</i> | TNF receptor superfamily member 1b                                                                | Plasma Membrane     | Transmembrane receptor  | Forward Sequence | CGTTCTCCAACACGACTTCATCC    | NM_001066      |
|                 |                                                                                                   |                     |                         | Reverse Sequence | ACGTGCCAGACTGCATCCATGCT    |                |
| <i>FN1</i>      | Fibronectin 1                                                                                     | Extracellular Space | Enzyme                  | Forward Sequence | ACAACACCGAGGTGACTGAGAC     | NM_212482      |
|                 |                                                                                                   |                     |                         | Reverse Sequence | GGACACAACCATGCTTCCCTGAG    |                |
| <i>SEMA6A</i>   | Semaphorin 6A                                                                                     | Plasma Membrane     | Transmembrane receptor  | Forward Sequence | ACCTGTATTGCCCTCCAGAGACC    | NM_020796      |
|                 |                                                                                                   |                     |                         | Reverse Sequence | CCAGACCATCTGTATTGCCACG     |                |
| <i>INHBB</i>    | Inhibin beta B subunit                                                                            | Extracellular Space | Growth factor           | Forward Sequence | GAAATCATCAGCTTCGCCGAGAC    | NM_002193      |
|                 |                                                                                                   |                     |                         | Reverse Sequence | GGCAGGAGTTTCAGGTAAGCC      |                |
| <i>GAL</i>      | Galanin and GMAP prepropeptide                                                                    | Extracellular Space | Other                   | Forward Sequence | TGGCAACCAAGTCAATTCAGC      | NM_015973      |
|                 |                                                                                                   |                     |                         | Reverse Sequence | TCAGGTATGGACCTGTCAAAGCT    |                |
| <i>PTGS2</i>    | Prostaglandin-endoperoxide synthase 2                                                             | Cytoplasm           | Enzyme                  | Forward Sequence | CGGTGAAACTCTGGCTAGACAG     | NM_000963      |
|                 |                                                                                                   |                     |                         | Reverse Sequence | GCAAACCGTAGATGCTCAGGGA     |                |
| <i>WNT11</i>    | Wnt family member 11                                                                              | Extracellular Space | Other                   | Forward Sequence | CTGTGAAGGACTCGGAACCTCGT    | NM_004626      |
|                 |                                                                                                   |                     |                         | Reverse Sequence | AGCTGTGCTTCCGTTGGATGT      |                |
| <i>TGFB2</i>    | Transforming growth factor beta 2                                                                 | Extracellular Space | Growth factor           | Forward Sequence | AAGAAGCGTGCTTTGGATGCGG     | NM_003238      |
|                 |                                                                                                   |                     |                         | Reverse Sequence | ATGCTCCAGCACAGAAGTTGGC     |                |
| <i>DKK1</i>     | Dickkopf WNT signaling pathway inhibitor 1                                                        | Extracellular Space | Growth factor           | Forward Sequence | GGTATTCCAGAAGACCACCTTG     | NM_012242      |
|                 |                                                                                                   |                     |                         | Reverse Sequence | CTTGGACCAGAAGTGTCTAGCAC    |                |
| <i>BST2</i>     | Bone marrow stromal cell antigen 2                                                                | Plasma Membrane     | Other                   | Forward Sequence | TCTCTGCAACAAGAGCTGACC      | NM_004335      |
|                 |                                                                                                   |                     |                         | Reverse Sequence | TCTCTGCATCCAGGGAAGCCAT     |                |
| <i>GATA2</i>    | GATA binding protein 2                                                                            | Nucleus             | Transcription regulator | Forward Sequence | CAGCAAGGCTCGTTCCTGTTCA     | NM_032638      |
|                 |                                                                                                   |                     |                         | Reverse Sequence | ATGAGTGGTCCGTTCTGCCCAT     |                |
| <i>EPCAM</i>    | Epithelial cell adhesion molecule                                                                 | Plasma Membrane     | Cell adhesion           | Forward Sequence | ACAAGGACACTGAAATAACCTGC    | NM_002354      |
|                 |                                                                                                   |                     |                         | Reverse Sequence | TTTTGAGAAGCAATTTTGAACCAGAT |                |
| <i>CK19</i>     | Keratin 19                                                                                        | Cytoplasm           | Intermediate filament   | Forward Sequence | GCGACTACAGCCACTACTACAG     | NM_002276      |
|                 |                                                                                                   |                     |                         | Reverse Sequence | CTTCGCATGTCACTCAGGATCT     |                |
| <i>ECAD</i>     | Cadherin-1                                                                                        | Plasma Membrane     | Cell adhesion           | Forward Sequence | CCGAGAGCTACACGTTCC         | NM_004360      |
|                 |                                                                                                   |                     |                         | Reverse Sequence | TCTTCAAATTCACCTGCCC        |                |
| <i>NCAD</i>     | Cadherin-2                                                                                        | Plasma Membrane     | Cell adhesion           | Forward Sequence | ACATATGTGATGACCGTAAC       | NM_001792      |
|                 |                                                                                                   |                     |                         | Reverse Sequence | TTTTTCTCGATCAAGTCCAG       |                |
| <i>VIM</i>      | Vimentin                                                                                          | Cytoplasm           | Intermediate filament   | Forward Sequence | GGAAACTAATCTGGATTCACTC     | NM_003380      |
|                 |                                                                                                   |                     |                         | Reverse Sequence | CACCTTAGTTTCAACCGTC        |                |
| <i>OPG</i>      | TNF receptor superfamily member 11b                                                               | Plasma Membrane     | Transmembrane receptor  | Forward Sequence | GGTCTGTGCTAAGTCTGAGAAAG    | NM_002546      |
|                 |                                                                                                   |                     |                         | Reverse Sequence | CAGCAAACCTGAAAGATGCCTCC    |                |
| <i>VEGF</i>     | Vascular endothelial growth factor A                                                              | Extracellular Space | Growth factor           | Forward Sequence | ATCTTCAAGCATCCTGTGT        | NM_001025366.2 |
|                 |                                                                                                   |                     |                         | Reverse Sequence | GCTCACCGCCTCGGCTTGT        |                |
| <i>ALDH1</i>    | Aldehyde dehydrogenase 1 family member A1                                                         | Cytoplasm           | Enzyme                  | Forward Sequence | CGGAAAAGCAATCTGAAGAGGG     | NM_000689      |
|                 |                                                                                                   |                     |                         | Reverse Sequence | GATGCGGCTATACAACACTGCC     |                |
| <i>CD133</i>    | Prominin-1                                                                                        | Plasma Membrane     | Other                   | Forward Sequence | TTGAATGAAACTCCAGAGCAA      | NM_001145847   |
|                 |                                                                                                   |                     |                         | Reverse Sequence | CCTCCTAGCACTGAATGATACTG    |                |
| <i>SOX2</i>     | SRY-box 2                                                                                         | Nucleus             | Transcription regulator | Forward Sequence | AGCATGGAGAAAACCCGGTA       | NM_003106      |
|                 |                                                                                                   |                     |                         | Reverse Sequence | TTTTGCGTGAAGTGTGGATGG      |                |
| <i>TWIST</i>    | Twist-related protein                                                                             | Nucleus             | Transcription factor    | Forward Sequence | GGCCGGAGACCTAGATGT         | NM_000474      |
|                 |                                                                                                   |                     |                         | Reverse Sequence | CACGCCCTGTTCTTTGAAT        |                |
| <i>SNAIL</i>    | Snail family transcriptional repressor                                                            | Nucleus             | Transcription repressor | Forward Sequence | TGCCCTCAAGATGCATCCGA       | NM_005985      |
|                 |                                                                                                   |                     |                         | Reverse Sequence | GGACAGGAGAAGGGCTTCTC       |                |
| <i>CEACAM1</i>  | Carcinoembryonic antigen related cell adhesion molecule 1                                         | Plasma Membrane     | Transporter             | Forward Sequence | GAGTAGTGGCCCTGGTTGCTC      | NM_001712      |
|                 |                                                                                                   |                     |                         | Reverse Sequence | CGCTGGTCGCTTGCCT           |                |
| <i>CMET</i>     | MET proto-oncogene, receptor tyrosine kinase                                                      | Plasma Membrane     | Transmembrane receptor  | Forward Sequence | TTATTAGTGGTGGGAGCACAAT     | NM_001127500   |
|                 |                                                                                                   |                     |                         | Reverse Sequence | GATGTTGACATGCCACTGTAAG     |                |
| <i>CD45</i>     | Protein tyrosine phosphatase, receptor type C                                                     | Plasma Membrane     | Transmembrane receptor  | Forward Sequence | TCACTGTCTCCTCAAAGTGA       | NM_002838      |
|                 |                                                                                                   |                     |                         | Reverse Sequence | AGATGTAAGTGGCCCTCTACTTGA   |                |
| <i>B2M</i>      | Beta-2-microglobulin                                                                              | Plasma Membrane     | Housekeeping gene       | Forward Sequence | GTCTTTCAAGCAAGACTGGTCT     | NM_004048      |
|                 |                                                                                                   |                     |                         | Reverse Sequence | TTACATGTCTCGATCCCACTTAAC   |                |

**Supplementary Table S3. List of antibodies used for the CTC lines protein characterization.**

| <b>Antibodies</b>        | <b>Supplier</b> | <b>Clone</b> | <b>Ref</b>  | <b>Conjugate</b> | <b>IgG</b>             |
|--------------------------|-----------------|--------------|-------------|------------------|------------------------|
| <b>CD105</b>             | Miltenyi        | 43A4E1       | 130-094-941 | PE               | Mouse IgG1             |
| <b>CD133</b>             | Miltenyi        | AC133        | 130-080-801 | PE               | Mouse IgG1             |
| <b>CD24</b>              | Miltenyi        | 32D12        | 130-095-953 | PE               | Mouse IgG1             |
| <b>PanCD66 (a,c,d,e)</b> | Miltenyi        | REA428       | 130-106-344 | PE               | Recombinant Human IgG1 |
| <b>PanCK (8,18,19)</b>   | Miltenyi        | CK3-6H5      | 130-080-101 | FITC             | Mouse IgG1             |
| <b>EpCAM</b>             | Miltenyi        | HEA-125      | 130-080-301 | FITC             | Mouse IgG1             |
| <b>CD146</b>             | Miltenyi        | 541-10B2     | 130-092-849 | APC              | Mouse IgG1             |
| <b>E-Cadherin</b>        | Miltenyi        | 67A4         | 130-095-412 | APC              | Mouse IgG1             |
| <b>CD44</b>              | Beckman Coulter | J.173        | IM1219U     | FITC             | Mouse IgG1             |
| <b>CD45</b>              | Beckman Coulter | J.33         | A07782      | FITC             | Mouse IgG1             |
| <b>CD34</b>              | Beckman Coulter | 581          | IM2709U     | ECD              | Mouse IgG1             |
| <b>CD309</b>             | Beckman Coulter | KDR-1        | A64616      | PC7              | Mouse IgG1             |
| <b>CXCR-4</b>            | Beckman Coulter | 12G5         | A07409      | PE               | Mouse IgG2             |
| <b>CD31</b>              | Biologend       | WM59         | 303114      | PB               | Mouse IgG1             |
| <b>EGFR</b>              | Biologend       | AY13         | 352908      | FITC             | Mouse IgG1             |
| <b>N-cadherin</b>        | Biologend       | 8C11         | 350805      | PE               | Mouse IgG1             |
| <b>CK19</b>              | Abcam           | EP1508Y      | Ab192643    | A488             | IgG                    |
| <b>ALDH1</b>             | Abcam           | EP1933Y      | ab195254    | A488             | IgG                    |
| <b>Her-2 neu</b>         | Abcam           | 24D2         | ab481188    | PE               | IgG2a                  |
| <b>Vimentin</b>          | BD Pharmingen   | RV202        | 562337      | PE               | Mouse IgG1             |
| <b>CK20</b>              | Progen          | IT-Ks20.10   | 61454       | FITC             | IgG1                   |
| <b>PD-L1</b>             | R&D system      | 130021       | FAB1561P    | PE               | Mouse IgG1             |
| <b>VEGF</b>              | R&D system      | 23410        | IC2931G     | A488             | Mouse IgG2             |
| <b>CD44v6</b>            | R&D system      | 2F10         | FAB3660A    | APC              | Mouse IgG1             |



Supplementary Table S5. Clinical data of the 044 COLOSPOT patient at baseline.

|                            |                              |
|----------------------------|------------------------------|
| <b>Inclusion number</b>    | <b>01-044</b>                |
| <b>Age</b>                 | 57                           |
| <b>Gender</b>              | Male                         |
| <b>Cancer localization</b> | Transverse colon             |
| <b>TNM classification</b>  | pTx pNx pM1                  |
| <b>Metastatic sites</b>    |                              |
| <i>Number</i>              | 2                            |
| <i>Localization</i>        | Liver          Lymph nodes   |
| <i>Size</i>                | 1* 22mm      Multiple* ≥15mm |
| <b>Tumor markers</b>       |                              |
| <i>CA19.9</i>              | 106.3 U/ml                   |
| <i>ACE</i>                 | 3.8 ng/ml                    |
| <b>Mutations</b>           |                              |
| <i>KRAS</i>                | Wild type                    |
| <i>BRAF</i>                | V600E mutation               |

Supplementary Table S6. Normalized quantification of mRNAs expression in all colon CTC lines, HT-29, SW620 and leukocytes.

|                          |                 | CTC-MCC-41 | CTC-MCC-41.4 | CTC-MCC-41.5A | CTC-MCC-41.5B | CTC-MCC-41.5C | CTC-MCC-41.5D | CTC-MCC-41.5E | CTC-MCC-41.5F | CTC-MCC-41.5G | HT-29 | SW620  | Leukocytes |
|--------------------------|-----------------|------------|--------------|---------------|---------------|---------------|---------------|---------------|---------------|---------------|-------|--------|------------|
| CTC-MCC, HT-29 & SW620   | <i>CK19</i>     | 154.83     | 31.52        | 55.31         | 33.15         | 28.51         | 23.31         | 105.38        | 34.95         | 71.48         | 43.83 | 107.92 | 0          |
|                          | <i>EPCAM</i>    | 6.72       | 29.84        | 40.61         | 53.38         | 12.93         | 16.71         | 165.62        | 38.80         | 16.78         | 36.45 | 69.73  | 0          |
|                          | <i>ECAD</i>     | 0.22       | 0.36         | 0.27          | 0.42          | 0.08          | 0.59          | 0.56          | 1.05          | 1.16          | 0.48  | 1.9    | 0          |
|                          | <i>VEGF</i>     | 9.74       | 4.46         | 40.30         | 64.13         | 5.14          | 36.31         | 12.66         | 58.19         | 20.53         | 2.08  | 7.64   | 0          |
|                          | <i>CMET</i>     | 31.14      | 3.86         | 8.74          | 34.25         | 0.77          | 2.51          | 42.35         | 5.63          | 6.50          | 7.70  | 12.5   | 0          |
|                          | <i>SNAIL</i>    | 1.41       | 0.45         | 2.11          | 3.88          | 3.84          | 2.33          | 8.04          | 17.41         | 11.00         | 0.05  | 3.82   | 0          |
|                          | <i>ALDH1</i>    | 13.22      | 2.49         | 47.12         | 14.70         | 41.42         | 7.24          | 18.35         | 60.17         | 43.33         | 58.73 | 0.30   | 0          |
|                          | <i>CEACAM1</i>  | 2.40       | 2.97         | 6.15          | 3.47          | 1.87          | 1.23          | 1.43          | 4.96          | 1.30          | 2.16  | 0.31   | 0          |
|                          | <i>NCAD</i>     | 0          | 0            | 0             | 0             | 0             | 0             | 0             | 0             | 0             | 0     | 0      | 0          |
|                          | <i>CD45</i>     | 0          | 0            | 0             | 0             | 0             | 0             | 0             | 0             | 0             | 0     | 0      | 4.52       |
| CTC-MCC vs HT-29 & SW620 | <i>IL33</i>     | 30.56      | 26.83        | 1.70          | 6.65          | 166.16        | 36.59         | 24.67         | 3.32          | 0.32          | 0     | 0      | 0          |
|                          | <i>SEMA6A</i>   | 10.04      | 95.07        | 1.36          | 69.40         | 1.17          | 0.47          | 3.53          | 2.07          | 0.70          | 0     | 0      | 0          |
|                          | <i>CCND2</i>    | 9.82       | 63.35        | 0.05          | 0.42          | 14.10         | 1.97          | 3.47          | 0.17          | 0.11          | 0     | 0      | 0          |
|                          | <i>OPG</i>      | 1.14       | 3.72         | 10.01         | 11.89         | 25.74         | 1.20          | 0.43          | 39.59         | 36.90         | 0     | 0      | 0          |
|                          | <i>SMARCA1</i>  | 0          | 0            | 0             | 0             | 0             | 0             | 0             | 0             | 0             | 6.10  | 5.67   | 0          |
|                          | <i>DKK1</i>     | 0          | 0            | 0             | 0             | 0             | 0             | 0             | 0             | 0             | 1.73  | 3.79   | 0          |
| CTC-MCC & SW620 vs HT-29 | <i>ADAMTS6</i>  | 0          | 0            | 0             | 0             | 0             | 0             | 0             | 0             | 0             | 0.61  | 0      | 0          |
|                          | <i>GATA2</i>    | 0          | 0            | 0             | 0             | 0             | 0             | 0             | 0             | 0             | 5.55  | 0      | 0          |
|                          | <i>GJB6</i>     | 0          | 0            | 0             | 0             | 0             | 0             | 0             | 0             | 0             | 0.45  | 0      | 0          |
|                          | <i>TGFB2</i>    | 0          | 0            | 0             | 0             | 0             | 0             | 0             | 0             | 0             | 4.21  | 0      | 0          |
|                          | <i>PTGS2</i>    | 0          | 0            | 0             | 0             | 0             | 0             | 0             | 0             | 0             | 6.33  | 0      | 0          |
|                          | <i>WNT11</i>    | 0          | 0            | 0             | 0             | 0             | 0             | 0             | 0             | 0             | 1.11  | 0      | 0          |
|                          | <i>BST2</i>     | 0          | 0            | 0             | 0             | 0             | 0             | 0             | 0             | 0             | 2.77  | 0      | 0          |
|                          | <i>TWIST</i>    | 0          | 0            | 0             | 0             | 0             | 0             | 0             | 0             | 0             | 15.93 | 0      | 0          |
|                          | <i>BCL11A</i>   | 1.70       | 3.93         | 9.67          | 5.98          | 0.89          | 0.62          | 1.29          | 2.812         | 2.42          | 0     | 2.09   | 0          |
|                          | <i>BMP7</i>     | 8.40       | 12.09        | 19.33         | 15.85         | 9.06          | 3.16          | 5.86          | 13.73         | 11.92         | 0     | 27.16  | 0          |
|                          | <i>FN1</i>      | 0.05       | 142.26       | 1.16          | 31.87         | 2.17          | 0.71          | 5.35          | 3.96          | 1.11          | 0     | 2.25   | 0          |
|                          | <i>TNFRSF1B</i> | 3.00       | 35.51        | 0.11          | 2.21          | 0.87          | 0.64          | 0.14          | 0.02          | 0.024         | 0     | 2.57   | 0          |
| CTC-MCC & HT-29 vs SW620 | <i>SOX2</i>     | 0          | 0            | 0             | 0             | 0             | 0             | 0             | 0             | 0             | 0     | 1.88   | 0          |
|                          | <i>VIM</i>      | 0          | 0            | 0             | 0             | 0             | 0             | 0             | 0             | 0             | 0     | 143.45 | 21.93      |
| CTC-MCC differences      | <i>DEFA6</i>    | 73.31      | 17.10        | 0             | 0             | 930.82        | 45.96         | 4.91          | 0             | 0.30          | 0     | 0      | 0          |
|                          | <i>ABCB1</i>    | 56.22      | 57.14        | 0             | 6.48          | 2.86          | 2.89          | 5.13          | 0             | 0.02          | 0     | 1.59   | 0          |
|                          | <i>GAL</i>      | 2.45       | 0            | 0             | 0             | 0.87          | 0.03          | 0.15          | 0             | 0.02          | 0     | 5.79   | 0          |

# Supplementary Table S7. Proteins expression by the 9 colon CTC lines using Flow cytometry.

|            | CTC-MCC-41 | CTC-MCC-41.4 | CTC-MCC-41.5A | CTC-MCC-41.5B | CTC-MCC-41.5C | CTC-MCC-41.5D | CTC-MCC-41.5E | CTC-MCC-41.5F | CTC-MCC-41.5G |
|------------|------------|--------------|---------------|---------------|---------------|---------------|---------------|---------------|---------------|
| E-cadherin | Low        | low          | low           | low           | +             | +             | +             | +             | +             |
| CK20       | ++         | ++           | ++            | ++            | ++            | ++            | ++            | +             | +             |
| PanCK      | ++         | ++           | ++            | ++            | ++            | ++            | ++            | ++            | ++            |
| CD31       | -          | -            | -             | -             | -             | -             | -             | -             | -             |
| CD146      | -          | -            | -             | -             | -             | -             | -             | -             | -             |
| CD105      | -          | -            | -             | -             | -             | -             | -             | -             | -             |
| CD34       | -          | -            | -             | -             | -             | -             | -             | -             | -             |
| ALDH1      | -          | -            | -             | -             | -             | -             | -             | -             | -             |
| CD309      | -          | -            | -             | -             | -             | -             | -             | -             | -             |
| PD-L1      | -          | -            | -             | -             | -             | -             | -             | -             | -             |
| CXCR4      | -          | -            | -             | -             | -             | -             | -             | -             | -             |
| HER-2 neu  | -          | -            | -             | -             | -             | -             | -             | -             | -             |
| FGF-2      | -          | -            | -             | -             | -             | -             | -             | -             | -             |
| OPG        | -          | -            | -             | -             | -             | -             | -             | -             | -             |

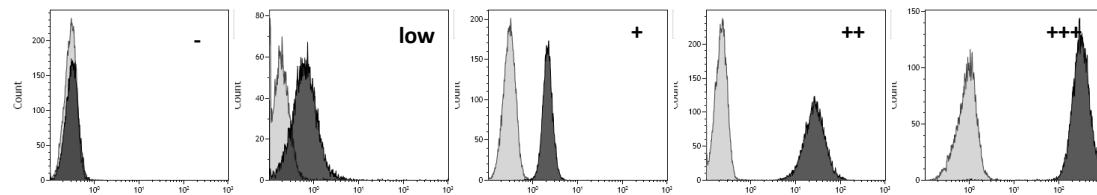

Supplement: 41598_2018_34365_MOESM1_ESM.pdf [file 41598_2018_34365_MOESM1_ESM.pdf]
